# Supplementary material for: Multiple Changes of Gene Expression and Function Reveal Genomic and Phenotypic Complexity in SLE-like Disease
Source: PLOS journal article supplement (doi:10.1371/journal.pgen.1005248), 2015-06-09
Supplement: S9 (10.1371/journal.pgen.1005248.s009) [file journal.pgen.1005248.s009]

**Table S2.** Allele frequencies and statistical results in the NSDTR population including all ANA-positive cases, ANA<sup>S</sup>, ANA<sup>H</sup> and controls. Five different DRB1, four DQA1 and five DQB1 alleles were identified.

| Allele     | ANA %<br>(2n=118) | ANA <sup>H</sup> %<br>(2n=52) | ANA <sup>S</sup> %<br>(2n=54) | Controls %<br>(2n=126) | Total population %<br>(2n=244) | OR  | P-value |
|------------|-------------------|-------------------------------|-------------------------------|------------------------|--------------------------------|-----|---------|
| DRB1*00401 | 0.0               | 0.0                           | 0.0                           | 0.8                    | 0.4                            | -   | -       |
| DRB1*00601 | 46.6              | 11.5                          | <b>85.2</b>                   | <b>37.3</b>            | 41.8                           | 9.7 | <0.0001 |
| DRB1*01501 | 16.9              | <b>32.7</b>                   | 3.7                           | <b>19.8</b>            | 18.4                           | 2.0 | 0.10    |
| DRB1*01502 | 33.1              | <b>53.8</b>                   | 7.4                           | <b>35.7</b>            | 34.4                           | 2.1 | 0.039   |
| DRB1*02301 | 3.4               | 1.9                           | 3.7                           | 6.3                    | 4.9                            | -   | -       |
| DQA1*00601 | 50.0              | <b>86.5</b>                   | 11.1                          | <b>55.6</b>            | 52.9                           | 5.1 | 0.00017 |
| DQA1*05011 | 46.6              | 11.5                          | <b>85.2</b>                   | <b>37.3</b>            | 41.8                           | 9.7 | <0.0001 |
| DQA1*00201 | 0.0               | 0.0                           | 0.0                           | 0.8                    | 0.4                            | -   | -       |
| DQA1*00301 | 3.4               | 1.9                           | 3.7                           | 6.3                    | 4.9                            | -   | -       |
| DQB1*02301 | 33.1              | <b>53.8</b>                   | 7.4                           | <b>35.7</b>            | 34.4                           | 2.1 | 0.039   |
| DQB1*02001 | 46.6              | 11.5                          | <b>85.2</b>                   | <b>37.3</b>            | 41.8                           | 9.7 | <0.0001 |
| DQB1*00301 | 16.9              | <b>32.7</b>                   | 3.7                           | <b>19.8</b>            | 18.4                           | 2.0 | 0.1     |
| DQB1*01501 | 0.0               | 0.0                           | 0.0                           | 0.8                    | 0.4                            | -   | -       |
| DQB1*00501 | 3.4               | 1.9                           | 3.7                           | 6.3                    | 4.9                            | -   | -       |

S= Speckled, H=Homogeneous

Bold indicate between what groups the largest difference in allele frequencies occurred and where statistics were performed (OR and P-values).
