# Supplementary material for: Multiple Changes of Gene Expression and Function Reveal Genomic and Phenotypic Complexity in SLE-like Disease
Source: PLOS journal article supplement (doi:10.1371/journal.pgen.1005248), 2015-06-09
Supplement: S13 (10.1371/journal.pgen.1005248.s013) [file journal.pgen.1005248.s013]

**Table S6.** Association of differential expression of *WFDC3* with genotyped variants on chromosome 24.

| <b>Genes</b>          | <b><i>WFDC3</i></b>                             |
|-----------------------|-------------------------------------------------|
| <b>SNPs genotyped</b> | gene expression median-fold change,<br>P-value* |
| 36011545              | ND                                              |
| 36063718              | 1.4X, $P=0.0061$                                |
| 36066098              | 1.4X, $P=0.0076$                                |
| 36075020              | ND                                              |
| 36075761              | 1.4X, $P=0.0039$                                |
| 36082324              | 1.4X, $P=0.0061$                                |
| 36087012              | 1.4X, $P=0.0075$                                |

\* Correlation was performed by ANOVA, ND – no difference
