# Supplementary material for: Multiple Changes of Gene Expression and Function Reveal Genomic and Phenotypic Complexity in SLE-like Disease
Source: PLOS journal article supplement (doi:10.1371/journal.pgen.1005248), 2015-06-09
Supplement: S16 (10.1371/journal.pgen.1005248.s016) [file journal.pgen.1005248.s016]

**Table S9.** Clinical manifestations in ANA positive NSDTRs.

| clinical signs | all ANA positive | ANA <sup>H</sup> | ANA <sup>S</sup> |
|----------------|------------------|------------------|------------------|
| stiffness      | 100%             |                  |                  |
| joint pain     | 100%             |                  |                  |
| skin lesions   | 13%              | 40%              | -                |
| muscle pain    | 25%              | 20%              | 27%              |
| fever          | 13%              | -                | 13%              |

Complete clinical data were available for 25 NSDTRs collected in Uppsala and examined at the University Animal Hospital at the Swedish University of Agricultural Sciences (SUAS). The remaining 27 dogs collected elsewhere else were diagnosed by local veterinarians as having IMRD, ANA pattern for all dogs was assayed in Uppsala.
